# Supplementary material for: Darwinian Evolution of Self-Replicating DNA in a Synthetic Protocell
Source: PubMed Central journal article supplement (PMC11494085; doi:10.1038/s41467-024-53226-0), 2024-10-22
Supplement: 41467_2024_53226_MOESM2_ESM.pdf [file 41467_2024_53226_MOESM2_ESM.pdf]

### **Description of Additional Supplementary Files**

Supplementary Data 1: Mapping and extraction of the frequency of occurrence of all the point mutations that were detected at a frequency of at least 1% in at least one of the evolutionary rounds.
